# Supplementary material for: Actors and networks in resource conflict resolution under climate change in rural Kenya
Source: Copernicus journal article supplement (doi:10.5194/esd-2015-89), 2016-01-18
Supplement: Supplementary file 1 [file esd-2015-89-supplement.pdf]

**SUPPLEMENT 1:** List of actors obtained from the interviews who are involved in resource governance in Loitoktok.

| No. ID | Acroymn        | Full Name                                                          | Type    | Sector             |
|--------|----------------|--------------------------------------------------------------------|---------|--------------------|
| 1      | DAO            | District Agricultural Office                                       | Public  | Agriculture        |
| 2      | AgriBD         | Agriculture Business Development                                   | Private | Agriculture        |
| 3      | KenyaSeed      | Kenya Seed Company                                                 | Public  | Agriculture        |
| 4      | NCPb           | National Cereals and Produce Board                                 | Public  | Agriculture        |
| 5      | ENSDA          | Ewaso Nyiro South Development Authority                            | Public  | Social development |
| 6      | KEPHIS         | Kenya Plant Health Inspectorate Service                            | Public  | Agriculture        |
| 7      | TOPServe       | Top Serve Company                                                  | Private | Agriculture        |
| 8      | Bayer          | Bayer Solutions Kenya                                              | Private | Agriculture        |
| 9      | AgroSolutions  | Agro-Solutions Limited                                             | Private | Agriculture        |
| 10     | CityFarming    | City Farming Kenya                                                 | Private | Agriculture        |
| 11     | Syngenta       | Syngenta Company                                                   | Private | Agriculture        |
| 12     | EquityBank     | Equity Bank                                                        | Private | Agriculture        |
| 13     | Mavuno         | Mavuno Limited                                                     | Private | Agriculture        |
| 14     | SMEP           | Small and Micro Enterprise Programme                               | Private | Agriculture        |
| 15     | IlkisonkoSacco | Ilkisonko Sacco                                                    | Private | Agriculture        |
| 16     | AFC            | Agricultural Finance Corporation                                   | Public  | Agriculture        |
| 17     | DLO            | District Livestock Officer                                         | Public  | Livestock          |
| 18     | DorcasAid      | Dorcas Aid                                                         | NGO     | Social development |
| 19     | DOREP          | Desert Oasis Residents Empowerment programme                       | Private | Livestock          |
| 20     | SNV            | Netherlands Development Organisation                               | Private | Social development |
| 21     | RedCross       | Red Cross                                                          | NGO     | Livestock          |
| 22     | ICPAK          | Intergovernmental Panel on Climate Prediction and Adaptation Kenya | Public  | Livestock          |
| 23     | SACDEP         | Sustainable Agriculture Community Development Programmes           | Private | Livestock          |
| 24     | ALLPRO         | ASA-Based Livestock and Rural Development Programmes               | Private | Livestock          |
| 25     | KVaccinePI     | Kenya Vaccine Production Institute                                 | Public  | Livestock          |
| 26     | FG1            | Farmers Groups                                                     | Civic   | Agriculture        |
| 27     | PastG1         | Pastoralists Groups                                                | Civic   | Livestock          |
| 28     | DKWS           | District Kenya Wildlife Service                                    | Public  | Wildlife           |
| 29     | DKFS           | District Kenya Forest Service                                      | Public  | Forestry           |
| 30     | GameScouts     | Game Scouts Association                                            | Civic   | Wildlife           |
| 31     | CouncilElders  | Council of Elders                                                  | Civic   | Social development |
| 32     | Tourists       | Tourists (Domestic & International)                                | Private | Wildlife           |
| 33     | AWF            | African Wildlife Foundation                                        | Private | Social development |
| 34     | ATE            | Amboseli Trust for Elephants                                       | Private | Wildlife           |
| 35     | ACC            | African Conservation Centre                                        | Private | Social development |
| 36     | ATGRCA         | Amboseli-Tsavo Group Ranches Conservation Association              | Civic   | Wildlife           |
| 37     | HospInv        | Minor hospitality Investors                                        | Private | Wildlife           |

**SUPPLEMENT 1:** List of actors obtained from the interviews who are involved in resource governance in Loitoktok.

| <b>No. ID</b> | <b>Acroymn</b>     | <b>Full Name</b>                                       | <b>Type</b> | <b>Sector</b>      |
|---------------|--------------------|--------------------------------------------------------|-------------|--------------------|
| 38            | USAID              | United States Agency for International Development     | Private     | Wildlife           |
| 39            | ParksCanada        | Parks Canada                                           | Private     | Wildlife           |
| 40            | AmboseliSerena     | Amboseli Serena                                        | Private     | Wildlife           |
| 41            | AmboseliSopa       | Amboseli Sopa                                          | Private     | Wildlife           |
| 42            | OltukaiLodge       | Oltukai Lodge                                          | Private     | Wildlife           |
| 43            | TawiLodge          | Tawi Lodge                                             | Private     | Wildlife           |
| 44            | TortilisCamp       | Tortilis Camp                                          | Private     | Wildlife           |
| 45            | PoriniCamp         | Porini Camp                                            | Private     | Wildlife           |
| 46            | CampiKanzi         | Campi ya Kanzi                                         | Private     | Wildlife           |
| 47            | ShompoleLodge      | Shompole Lodge                                         | Private     | Wildlife           |
| 48            | OldonyoWuasLodge   | Oldonyo-Wuas Lodge                                     | Private     | Wildlife           |
| 49            | ChyuluConservancy  | Chyulu Conservancy                                     | Private     | Wildlife           |
| 50            | OlkeriSanctuary    | Olkeri Sanctuary                                       | Private     | Wildlife           |
| 51            | KimanaSanctuary    | Kimana Sanctuary                                       | Private     | Wildlife           |
| 52            | BeadWorkCGs        | Bead-Work Community groups                             | Civic       | Wildlife           |
| 53            | CulturalBsAmboseli | Cultural Bomas in Amboseli                             | Civic       | Wildlife           |
| 54            | WWF                | World Wildlife Fund                                    | Private     | Forestry           |
| 55            | AMREF              | African Medical and Research Foundation                | NGO         | Social development |
| 56            | EnvCGs1            | Environmental Community Groups                         | Civic       | Forestry           |
| 57            | SFS                | School of Field Studies (USA)                          | Private     | Wildlife           |
| 58            | DWO                | District Water Office                                  | Public      | Water              |
| 59            | WaterPGs1          | Water Project Community Groups                         | Civic       | Water              |
| 60            | WRUA1              | Water Resource users Associations                      | Civic       | Water              |
| 61            | WRMA               | Water Resource Management Authority                    | Public      | Water              |
| 62            | DIO                | District Irrigation Office                             | Public      | Water              |
| 63            | LWC                | Loitoktok Water Company                                | Public      | Water              |
| 64            | UNICEF             | United Nations Children's Fund                         | Private     | Water              |
| 65            | DSdO               | District Social Development Office                     | Public      | Social development |
| 66            | CYEDF              | Constituency Youth Enterprise Development Funds Office | Public      | Social development |
| 67            | YGs1               | Youth Groups                                           | Civic       | Social development |
| 68            | CWEF               | Constituency Women Enterprise Funds Office             | Public      | Social development |
| 69            | WGs1               | Community Water Groups                                 | Civic       | Social development |
| 70            | WelfareCGs         | Welfare Community Groups                               | Civic       | Social development |
| 71            | SelfhelpCGs        | Self-help Community Groups                             | Civic       | Social development |
| 72            | BusinessCGs        | Education Community Groups                             | Civic       | Education          |
| 73            | HerbalistCGs       | Herbalist Association                                  | Civic       | Forestry           |
| 74            | DLG                | Local Government Office in district                    | Public      | Social development |

**SUPPLEMENT 1:** List of actors obtained from the interviews who are involved in resource governance in Loitoktok.

| <b>No. ID</b> | <b>Acroymn</b>  | <b>Full Name</b>                                      | <b>Type</b> | <b>Sector</b>      |
|---------------|-----------------|-------------------------------------------------------|-------------|--------------------|
| 75            | FARAJATRUST     | Faraja Trust                                          | NGO         | Social development |
| 76            | PACTKENYA       | Pact Kenya                                            | NGO         | Social development |
| 77            | LEWETKENYA      | Lewet Kenya                                           | NGO         | Social development |
| 78            | NOOMAYIANAT     | Noomayianat                                           | Civic       | Social development |
| 79            | NIA             | NIA organisation                                      | Civic       | Water              |
| 80            | MaasaiLionTrust | Maasai Lion Trust                                     | Private     | Wildlife           |
| 81            | KARI            | Kenya Agricultural Research Institute                 | Public      | Agriculture        |
| 82            | HCDA            | Horticultural Crops Development Authority             | Public      | Agriculture        |
| 83            | Wingsfor Earth  | Wings for Earth                                       | NGO         | Agriculture        |
| 84            | ICIPE           | International Centre of Insect Physiology and Ecology | Private     | Agriculture        |
| 85            | KEFRI           | Kenya Forest Research Institute                       | Public      | Forestry           |
| 86            | AMIRAN          | AMIRAN Kenya Ltd                                      | Private     | Agriculture        |
